# Supplementary material
Source: PubMed Central journal article supplement (PMC6544527)
Supplement: EMS82666-supplement-Supplementary_Information.pdf [file EMS82666-supplement-Supplementary_Information.pdf]

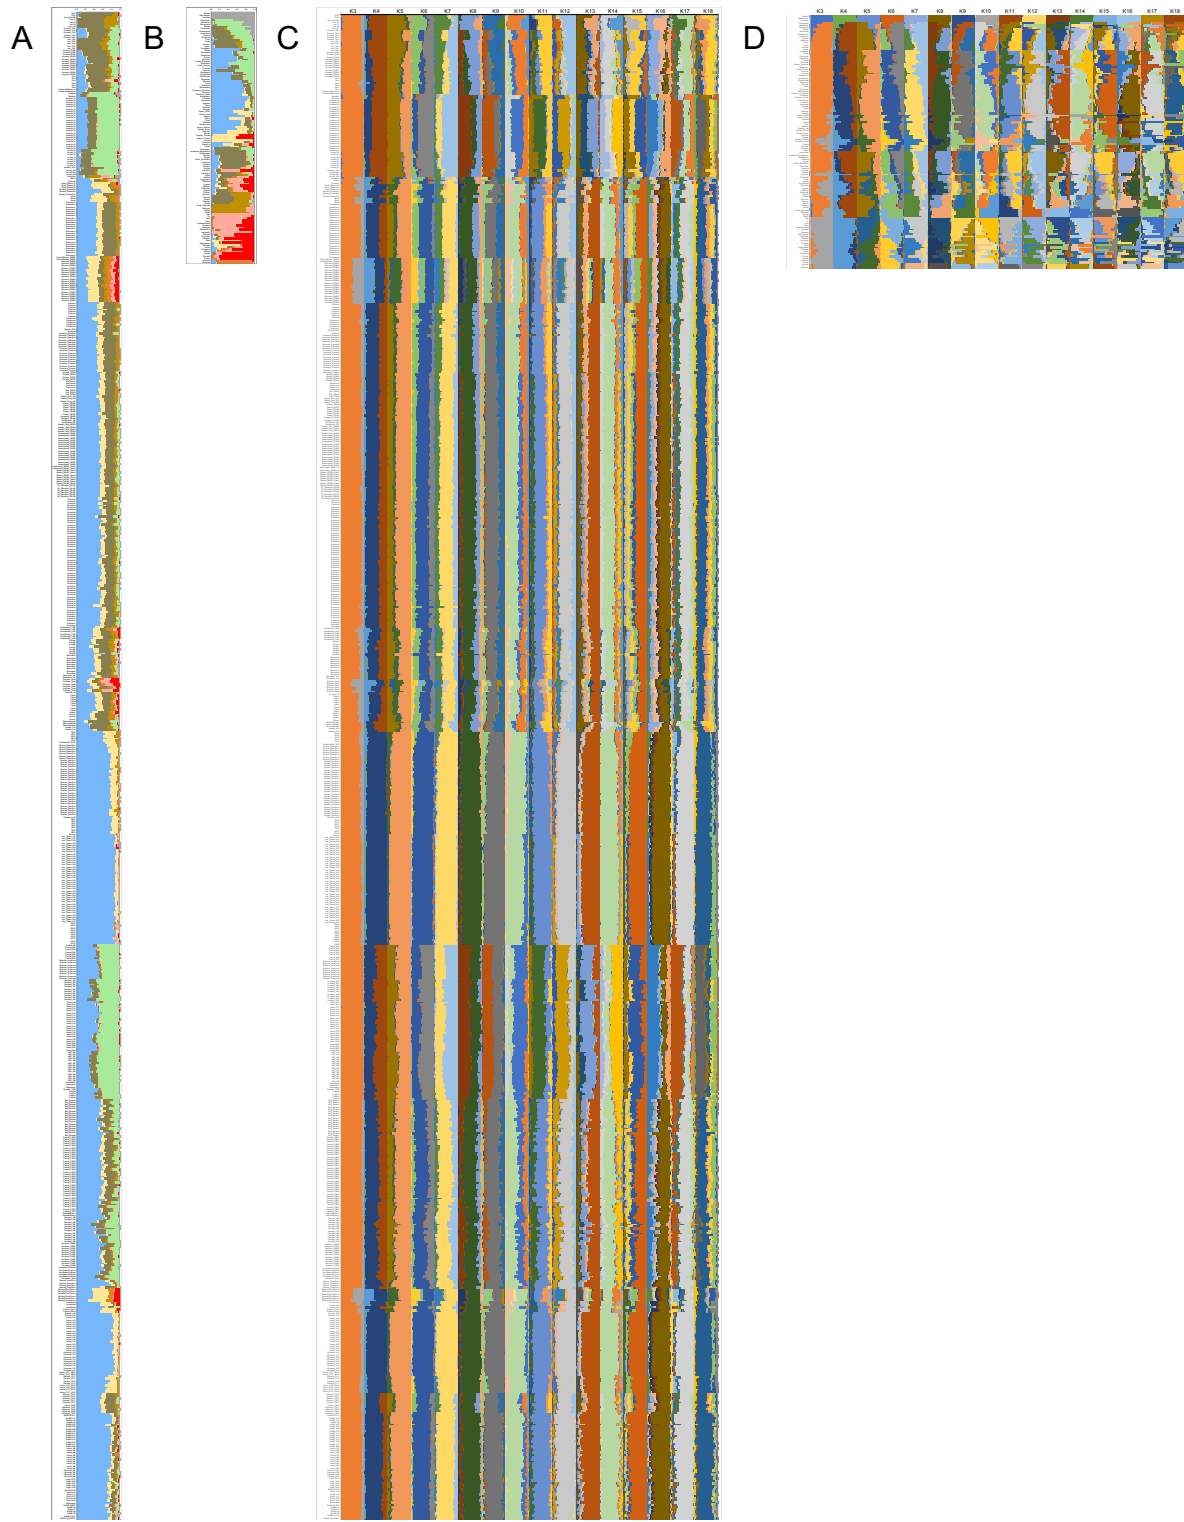

**Figure S1. ADMIXTURE analysis results with ancient data projected onto the modern genetic structure. Related to Figure 1. A. Ancient individuals at K9. B. Modern population averages at K9. C. Ancient individuals at K3 to K18. D. Modern population averages at K3 to K18.**

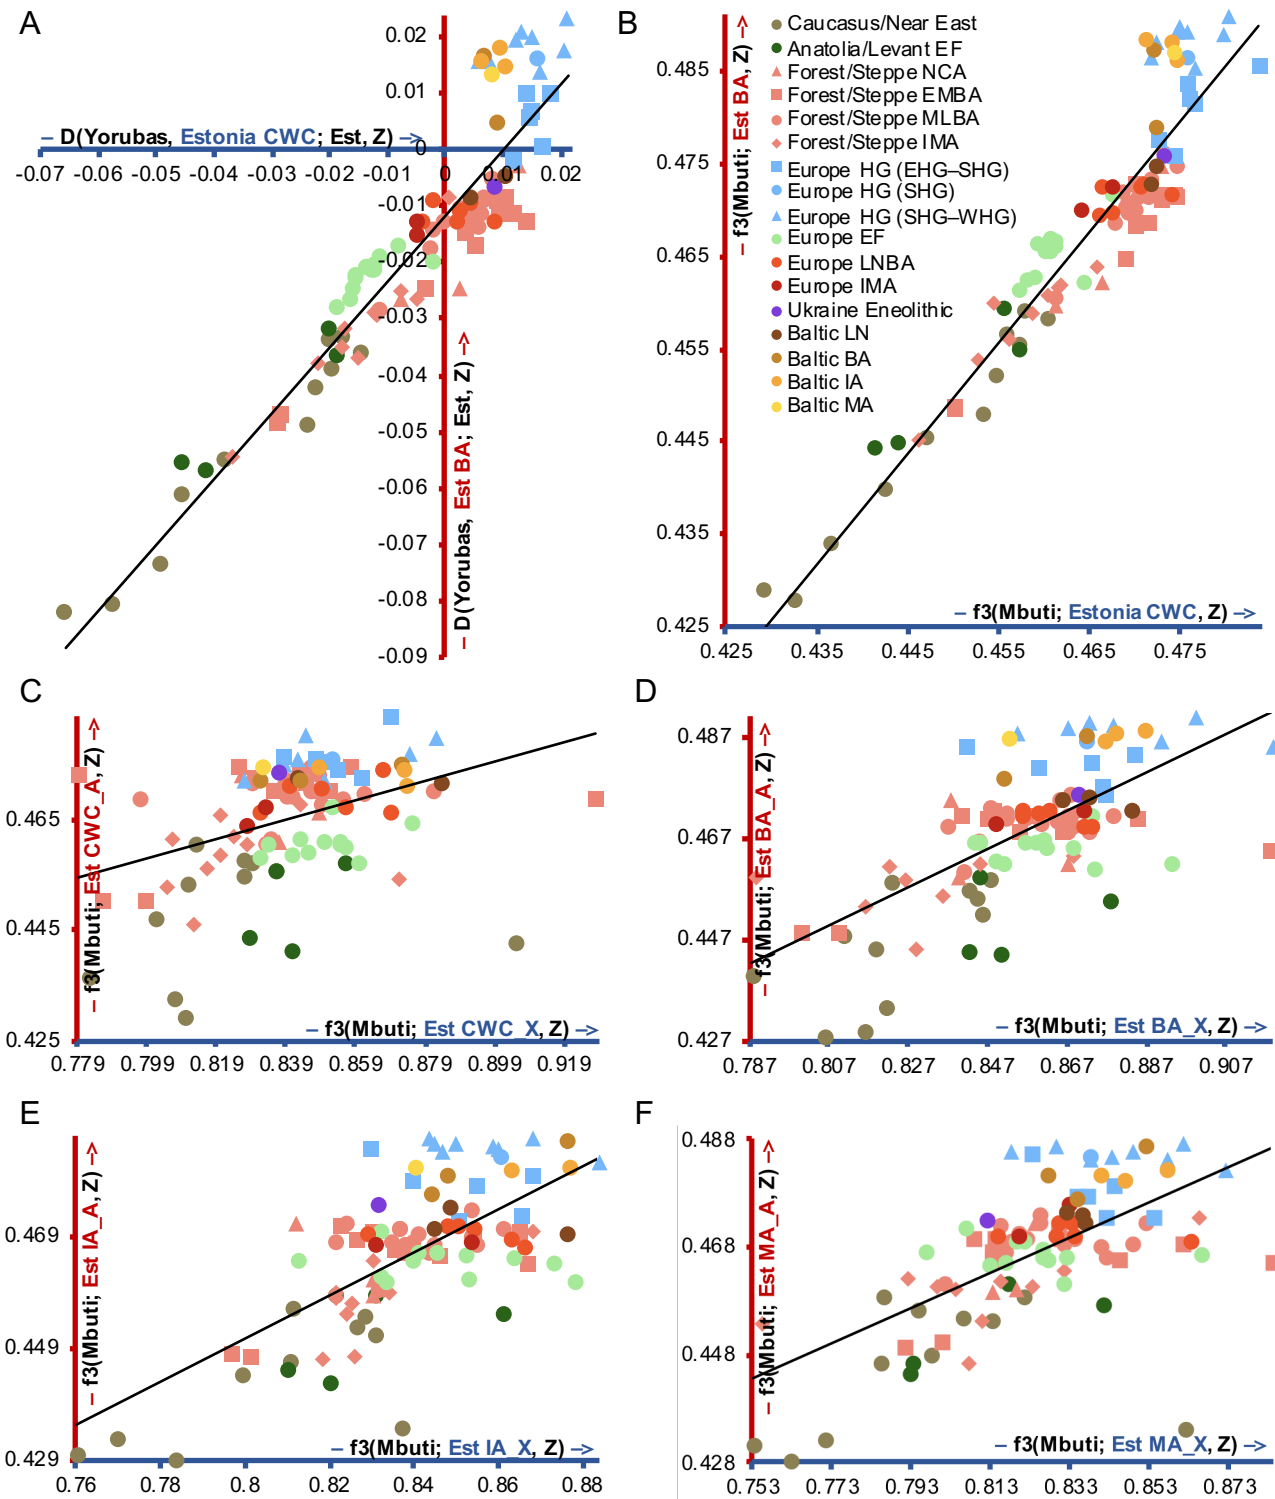

**Figure S2. D and outgroup f3 statistics' results. Related to Figure 2.** EF – early farmers; HG – hunter-gatherers; LNBA – Late Neolithic/Bronze Age; IMA – Iron/Middle Ages; LN – Late Neolithic; BA – Bronze Age; IA – Iron Age; MA – Middle Ages. A. D statistics' values of form  $D(\text{Yorubas}, \text{Estonian Corded Ware culture/Bronze Age}; \text{Estonians, ancient})$ . B. Outgroup f3 statistics' values of form  $f_3(\text{Mbuti}; \text{Estonian Corded Ware culture/Bronze Age}, \text{ancient})$  using 1240k capture SNPs. C–F. Outgroup f3 statistics' values of form  $f_3(\text{Mbuti}; \text{autosomal SNPs}/\text{chr X SNPs}, \text{modern})$  of Estonian Corded Ware culture, Bronze Age, Iron Age and Middle Ages respectively using 1240k capture SNPs.

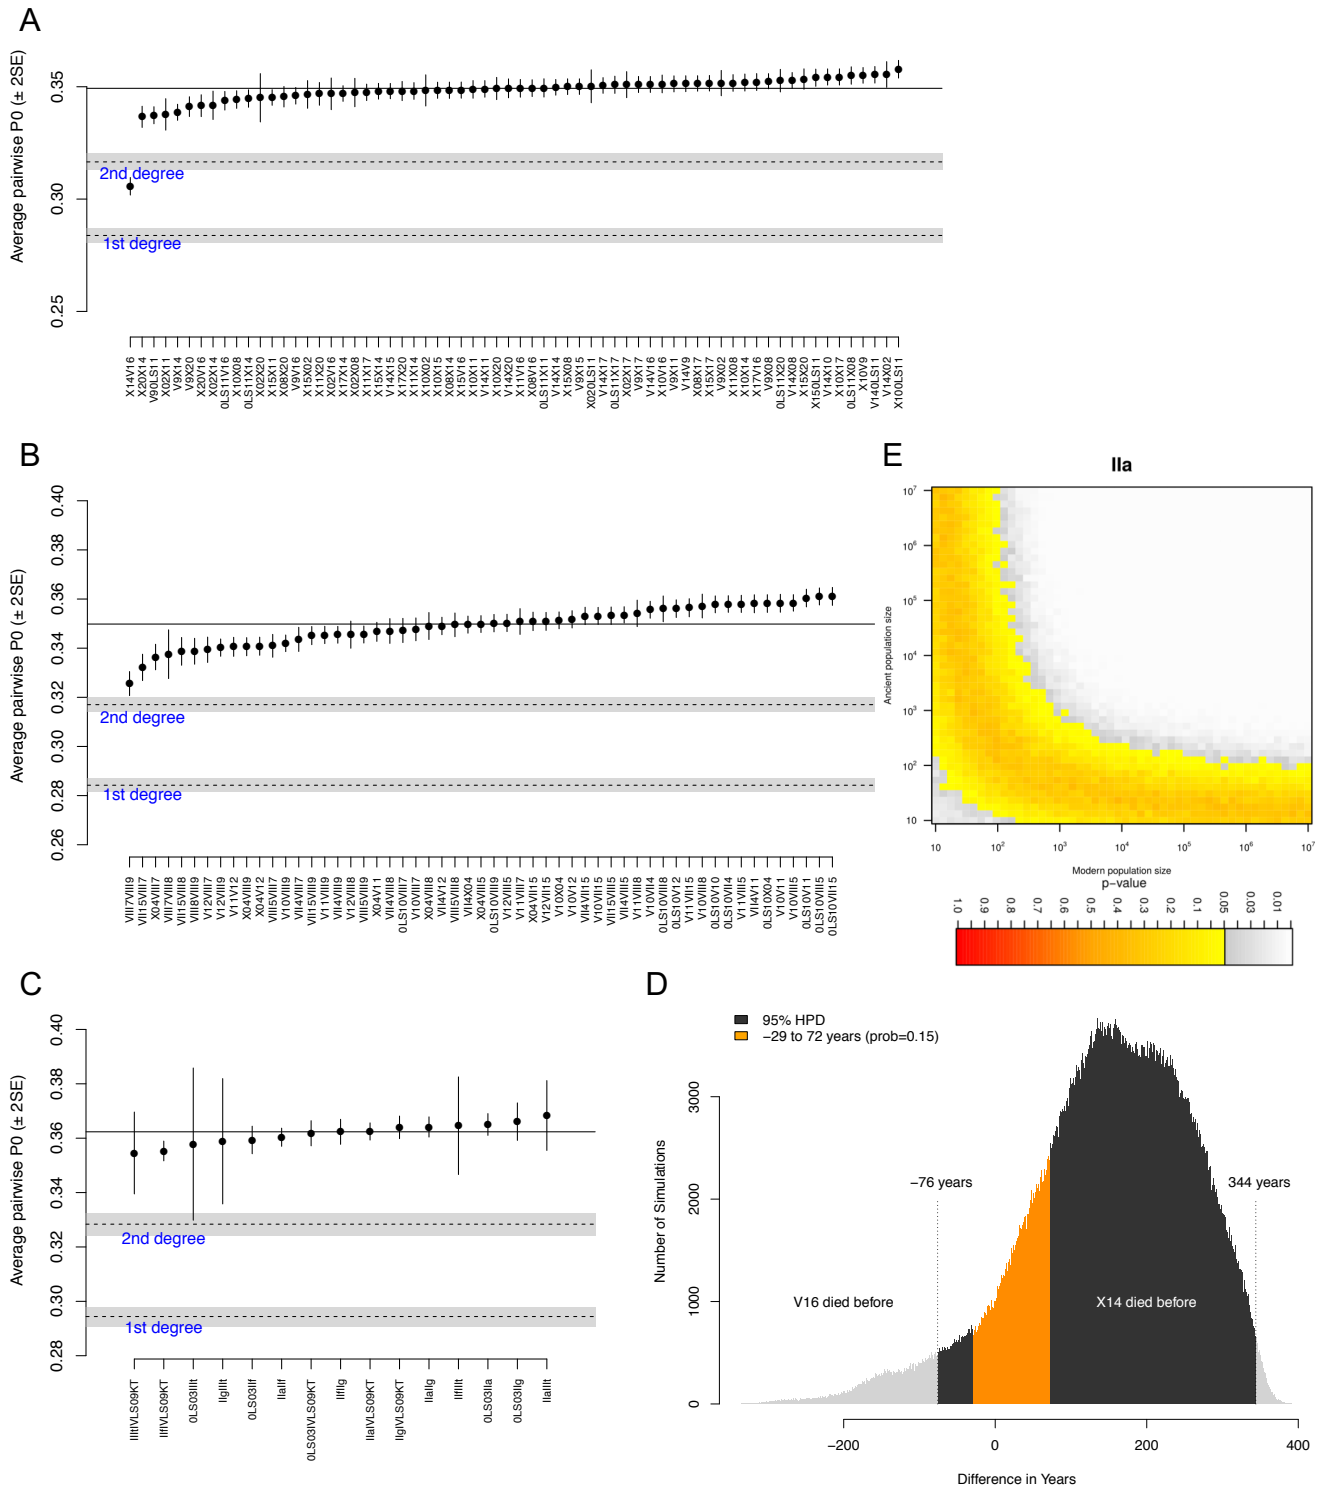

**Figure S3. Kinship test results, date difference probability estimation for found relatives and continuity test results. Related to Table 1. A.** Bronze Age Estonian kinship test results. **B.** Iron Age Estonian and Ingrian kinship test results. **C.** Middle Age Estonian kinship test results. **D.** Probabilistic estimate for the distance in time between the radiocarbon dates associated with X14 and V16 obtained via one million MC simulations of calendar dates. **E.** Continuity test results between a Middle Age Estonian genome and modern Estonians.

| Modern population | References    | PCA | f3,<br>D | ADM,<br>CP | Ancient population   | References | PCA | f3,<br>D | ADM |
|-------------------|---------------|-----|----------|------------|----------------------|------------|-----|----------|-----|
| Abkhasians        | [S15]         | +   | +        | +          | Afanasievo           | [S16,S17]  | +   | +        | +   |
| Adygei            | [S18]         | +   | +        | +          | Aktogai_MLBA         | [S17]      | +   | +        | +   |
| Altaians          | [S19,S20]     |     | +        | +          | Alan                 | [S21]      | +   | +        | +   |
| Armenians         | [S15]         | +   | +        | +          | Anatolia_ChL         | [S16]      | +   | +        | +   |
| Azeris            | [S22]         | +   | +        | +          | Anatolia_N           | [S16]      | +   | +        | +   |
| Balkars           | [S15]         | +   | +        | +          | Andronovo            | [S16,S21]  | +   | +        | +   |
| Balochi           | [S18]         |     |          | +          | Armenia_ChL          | [S16]      | +   | +        | +   |
| Bantus            | [S18]         |     |          | +          | Armenia_EBA          | [S16]      | +   | +        | +   |
| Bashkirs          | [S22]         |     | +        | +          | Armenia_MLBA         | [S16]      | +   | +        | +   |
| Basques           | [S18]         | +   | +        | +          | Bell_Beaker          | [S16]      | +   | +        | +   |
| Belorussians      | [S23,S24]     | +   | +        | +          | Bichon               | [S16]      | +   | +        | +   |
| Brahui            | [S18]         |     |          | +          | Bolshoy Oleni Ostrov | [S25]      | +   | +        | +   |
| Bulgarians        | [S15]         | +   | +        | +          | Botai                | [S26]      | +   | +        | +   |
| Burusho           | [S18]         |     |          | +          | Cardial_EN           | [S16]      | +   | +        | +   |
| Buryats           | [S19]         |     | +        | +          | Central_LNBA         | [S16]      | +   | +        | +   |
| Chechens          | [S15]         | +   | +        | +          | Central_MN           | [S16]      | +   | +        | +   |
| Chukchis          | [S19,S27]     |     | +        | +          | CentralSteppe_EMBA   | [S26]      | +   | +        | +   |
| Chuvash           | [S23]         |     | +        | +          | Chalmy Varre         | [S25]      | +   | +        | +   |
| Cypriots          | [S23]         | +   | +        | +          | CHG                  | [S16]      | +   | +        | +   |
| Daur              | [S18]         |     | +        | +          | Dali_MLBA            | [S17]      | +   | +        | +   |
| Dolgans           | [S19,S27]     |     | +        | +          | Dashti_Kozy_BA       | [S17]      | +   | +        | +   |
| Erza              | [S15]         |     |          | +          | EHG                  | [S16,S28]  | +   | +        | +   |
| Estonians         | [S20,S24,S29] | +   | +        | +          | Estonia_CCC          | [S28,S30]  | +   | +        | +   |
| Ethiopians        | [S23]         |     |          | +          | Estonia_CWC          | [S28,S30]  | +   | +        | +   |
| Evenkis           | [S19]         |     | +        | +          | Estonia_HG           | [S28,S30]  | +   | +        | +   |
| Evens             | [S20,S27]     |     | +        | +          | Globular_Amphora     | [S31]      | +   | +        | +   |
| Finns             | [S29]         | +   | +        | +          | HallstattBylany      | [S21]      | +   | +        | +   |
| French            | [S18]         | +   | +        | +          | Hungarian_Med        | [S21]      | +   | +        | +   |
| Gagauzes          | [S15,S29]     | +   | +        | +          | HungarianScythian    | [S21]      | +   | +        | +   |
| Germans           | [S15,S29]     | +   | +        | +          | Hungary_BA           | [S16]      | +   | +        | +   |
| Han               | [S18]         |     | +        | +          | Hungary_EN           | [S16]      | +   | +        | +   |
| Hazara            | [S18]         |     |          | +          | Iberia_BA            | [S16]      | +   | +        | +   |
| Hezhen/Nanaj      | [S18]         |     | +        | +          | Iberia_ChI           | [S16]      | +   | +        | +   |
| Hungarians        | [S23]         | +   | +        | +          | Iberia_EN            | [S16]      | +   | +        | +   |
| Ingrian_Finns     | [S29]         | +   | +        | +          | Iberia_MN            | [S16]      | +   | +        | +   |
| Iranians          | [S23]         |     | +        | +          | Iran_ChL             | [S16]      | +   | +        | +   |
| Japanese          | [S18]         |     | +        | +          | Iran_Hotulllb        | [S16]      | +   | +        | +   |
| Jordanians        | [S23]         | +   | +        | +          | Iran_LN              | [S16]      | +   | +        | +   |
| Kalmyks           | [S22]         |     | +        | +          | Iran_N               | [S16]      | +   | +        | +   |
| Karelians         | [S15,S29]     | +   | +        | +          | Iron_Gates_HG        | [S31]      | +   | +        | +   |
| Kazakhs           | [S20]         |     | +        | +          | Kairan_MLBA          | [S17]      | +   | +        | +   |
| Kets              | [S19,S27]     |     | +        | +          | Kangju               | [S21]      | +   | +        | +   |
| Khakases          | [S27]         |     | +        | +          | Karagash_MLBA        | [S17]      | +   | +        | +   |
| Khanty            | [S29]         |     | +        | +          | Kashkarchi_BA        | [S17]      | +   | +        | +   |
| Komis             | [S22]         |     | +        | +          | Kazakh_His           | [S21]      | +   | +        | +   |
| Koryaks           | [S19,S27]     |     | +        | +          | Kazakh_Mys_MLBA      | [S17]      | +   | +        | +   |
| Kумыks            | [S15]         | +   | +        | +          | Kostenki             | [S16]      |     |          | +   |
| Kurds             | [S15]         |     | +        | +          | Krasnoyarsk_MLBA     | [S17]      | +   | +        | +   |
| Kyrgyzians        | [S20]         |     | +        | +          | Latvia_BA            | [S28]      | +   | +        | +   |
| Latvians          | [S24,S29]     | +   | +        | +          | Latvia_CCC_EHG       | [S31,S32]  | +   | +        | +   |
| Lebanese          | [S23]         | +   | +        | +          | Latvia_CCC_WHG       | [S31,S32]  | +   | +        | +   |
| Lezgins           | [S23]         | +   | +        | +          | Latvia_CWC           | [S32]      | +   | +        | +   |
| Lithuanians       | [S23]         | +   | +        | +          | Latvia_HG            | [S31,S32]  | +   | +        | +   |

|                       |               |  |  |   |                         |           |   |   |   |
|-----------------------|---------------|--|--|---|-------------------------|-----------|---|---|---|
| Makrani               | [S18]         |  |  | + | LBK_EN                  | [S16]     | + | + | + |
| Malayan               | [S23]         |  |  | + | LchashenMetsamor        | [S21]     | + | + | + |
| Mandenkas             | [S18]         |  |  | + | Levant_BA               | [S16]     | + | + | + |
| Mansis                | [S29]         |  |  | + | Levant_N                | [S16]     | + | + | + |
| Maris                 | [S20,S29]     |  |  | + | Lisakovskiy_MLBA_Alakul | [S17]     | + | + | + |
| Moksha                | [S15]         |  |  | + | Lithuania_BA            | [S28]     | + | + | + |
| Mongola               | [S18]         |  |  | + | Lithuania_CWC           | [S28]     | + | + | + |
| Mongolians            | [S19]         |  |  | + | Lithuania_HG            | [S28]     | + | + | + |
| Mordovians            | [S15]         |  |  | + | Levänuhta               | [S25]     | + | + | + |
| Moroccans             | [S23]         |  |  | + | Maitan_MLBA_Alakul      | [S17]     | + | + | + |
| Mozabites             | [S18]         |  |  | + | Mal'ta                  | [S16]     |   |   | + |
| Nenets                | [S22]         |  |  | + | Natufian                | [S16]     | + | + | + |
| Nganasans             | [S19]         |  |  | + | NLithuania              | [S21]     | + | + | + |
| Nivkhs                | [S27]         |  |  | + | Northern_LNBA           | [S16]     | + | + | + |
| Nogais                | [S15]         |  |  | + | Okunevo_EMBA            | [S26]     | + | + | + |
| North_Italians        | [S18]         |  |  | + | Oy_Dzhaylau_MLBA        | [S17]     | + | + | + |
| North_Kannadi         | [S19]         |  |  | + | Petrovka                | [S17]     | + | + | + |
| North_Ossetians       | [S15]         |  |  | + | Poltavka                | [S16,S17] | + | + | + |
| northwest_Mingrelians | [S23]         |  |  | + | Poprad                  | [S21]     | + | + | + |
| Orcadians             | [S18]         |  |  | + | Potapovka               | [S16,S17] | + | + | + |
| Oroqens               | [S18]         |  |  | + | Remedello               | [S16]     | + | + | + |
| Palestinians          | [S18]         |  |  | + | Romania_HG              | [S31]     | + | + | + |
| Paniya                | [S23]         |  |  | + | Russia_EBA              | [S16]     | + | + | + |
| Pathan                | [S18]         |  |  | + | SaltovoMayaki           | [S21]     | + | + | + |
| Poles                 | [S33]         |  |  | + | Samara_Eneolithic       | [S16]     | + | + | + |
| Portugese             | [S29]         |  |  | + | Sarmatian               | [S21]     | + | + | + |
| Romanians             | [S23]         |  |  | + | Sarmatian_SU            | [S34]     | + | + | + |
| Russians_Central      | [S22,S23]     |  |  | + | Scythian_East           | [S34]     | + | + | + |
| Russians_North        | [S18,S22-S24] |  |  | + | Scythian_IA             | [S16]     | + | + | + |
| Russians_South        | [S22]         |  |  | + | SHG                     | [S16,S28] | + | + | + |
| Saami_Kola            | [S29]         |  |  | + | SidelkinoEHG_ML         | [S26]     | + | + | + |
| Saami_SWE             | [S29]         |  |  | + | Sintashta               | [S16,S17] | + | + | + |
| Sakilli               | [S23]         |  |  | + | Srubnaya                | [S16,S17] | + | + | + |
| Sardinians            | [S18]         |  |  | + | Sweden_LNBA             | [S28]     | + | + | + |
| Saudis                | [S23]         |  |  | + | Sweden_TRB              | [S28]     | + | + | + |
| Selkups               | [S19,S20]     |  |  | + | Tagar                   | [S21]     | + | + | + |
| Shors                 | [S27]         |  |  | + | Trypillia               | [S31]     | + | + | + |
| Sindhi                | [S18]         |  |  | + | Ukraine_Eneolithic      | [S31]     | + | + | + |
| Slovaks               | [S24]         |  |  | + | Ukraine_Mesolithic      | [S31,S32] | + | + | + |
| Spaniards             | [S23]         |  |  | + | Ukraine_Neolithic       | [S31,S32] | + | + | + |
| Swedes                | [S29,S33]     |  |  | + | Ust-Ishim               | [S16]     |   |   | + |
| Syrians               | [S23]         |  |  | + | West_Siberia_N          | [S17]     | + | + | + |
| Tajiks                | [S15]         |  |  | + | WHG                     | [S16,S31] | + | + | + |
| Tatars                | [S15,S29]     |  |  | + | Wusun                   | [S21]     | + | + | + |
| Tu                    | [S18]         |  |  | + | Yamnaya                 | [S26]     | + | + | + |
| Turkmens              | [S15]         |  |  | + | Yamnaya_Bulgaria        | [S31]     | + | + | + |
| Turks                 | [S23]         |  |  | + | Yamnaya_Kalmykia        | [S16]     | + | + | + |
| Tuscans               | [S18]         |  |  | + | Yamnaya_Samara          | [S16]     | + | + | + |
| Tuvinians             | [S19,S22]     |  |  | + | Yamnaya_Ukraine         | [S31]     | + | + | + |
| Udmurts               | [S22]         |  |  | + | Zevakinskiy_LBA         | [S17]     | + | + | + |
| Ukrainians            | [S15]         |  |  | + |                         |           |   |   |   |
| Uygurs                | [S18]         |  |  | + |                         |           |   |   |   |
| Uzbeks                | [S20,S23]     |  |  | + |                         |           |   |   |   |
| Vepsas                | [S15,S29]     |  |  | + |                         |           |   |   |   |
| Welsh                 | [S29]         |  |  | + |                         |           |   |   |   |

|           |           |   |   |  |
|-----------|-----------|---|---|--|
| Xibo      | [S18]     | + | + |  |
| Yakuts    | [S18,S27] | + | + |  |
| Yemenese  | [S23]     |   | + |  |
| Yorubas   | [S18]     | + | + |  |
| Yukaghirs | [S19]     | + | + |  |

**Table S3. Modern and ancient comparison populations for principal component (PCA), outgroup f3 and D statistics' (f3, D), ADMIXTURE (ADM) and ChromoPainter (CP) analyses. Related to Figures 1, 2, 3, S1 and S2.**

## Supplemental References

- S1. Oras, E., Lang, V., Rannamäe, E., Varul, L., Konsa, M., Limbo-Simovart, J., Vedru, G., Laneman, M., Malve, M., and Price, T.D. (2016). Tracing prehistoric migration: isotope analysis of Bronze and Pre-Roman Iron Age coastal burials in Estonia. *Est. J. Archaeol.* 20: 1, 3–32.
- S2. Laneman, M., and Lang, V. (2013). New radiocarbon dates for two stone-cist graves at Muuksi, northern Estonia. *Est. J. Archaeol.* 17: 2, 89–122.
- S3. Friedenthal, A. (1932). Ein Beitrag zur vorgeschichtlichen Anthropologie Estlands. *Z. Für Ethnol.* 63, 1–42.
- S4. Kalman, J. (1998). Skeletal report. In *Aruanne kivikirstkalmete kaevamistest Muuksi Hundikangrutes 1996–1997*, G. Vedru. (Manuscript in the archive of the archaeology department of the University of Tartu). (Tartu).
- S5. Kalman, J. (1999). Human remains from the stone-cist graves of Rebala Lastekangrud, North Estonia. *Est. J. Archaeol.* 3: 1, 19–34.
- S6. Laneman, M., Lang, V., Malve, M., and Rannamäe, E. (2015). New data on Jaani stone graves at Vão, Northern Estonia. *Est. J. Archaeol.* 19: 2, 110–137.
- S7. Laneman, M., Lang, V., and Saage, R. (2016). Burial site hidden in a clearance cairn at Alu, Raplamaa. *Archaeol. Fieldwork Est.* 2015, 35–46.
- S8. Kalman, J. (2000). Skeletal analysis of the graves of Kaseküla, Poanse I and Poanse II. In *Töid ajaloo alalt II*. (Tallinn: Eesti Ajaloomuuseum), pp. 17–40.
- S9. Kalman, J. (2000). Stone grave II of Tõugu – skeletal report. In *Keskusest ääremaaks. Viljelusmajandusliku asustuse kujunemine ja areng Vihasoo–Palmse piirkonnas Virumaal*, V. Lang. *Muinasaja teadus*, 7. (Tallinn), pp. 387–407.
- S10. Lang, V. (2000). *Keskusest ääremaaks. Viljelusmajandusliku asustuse kujunemine ja areng Vihasoo–Palmse piirkonnas Virumaal. Muinasaja teadus*, 7. (Tallinn).
- S11. Kalman, J. (2000). Tandemägi stone grave – osteological report. In *Keskusest ääremaaks. Viljelusmajandusliku asustuse kujunemine ja areng Vihasoo–Palmse piirkonnas Virumaal*, V. Lang. *Muinasaja teadus*, 7. (Tallinn), pp. 423–436.
- S12. Yushkova, M.A., and Kulešov, V.S. (2011). Kyorstovo 1: a new burial ground of the period of Roman influences in North-Western Russia. *Archaeol. Litu.* 12, 99–121.
- S13. Shirobokov, I.G., and Yushkova, M.A. (2014). Антропологические материалы из коллективных захоронений по обряду кремации и ингумации каменного могильника с оградками Малли (по результатам раскопок 2010 г.). (Anthropological materials from collective burials according to the rite of cremation and inhumation of a stone fence burial ground in Malli (according to the results of excavations in 2010)). *Bull. Archeol. Anthropol. Ethnogr.* 2, 71–79. (In Russian).
- S14. Mikhaylova, E.R. (2016). The population of the south-eastern coast of the Gulf of Finland and its contacts with the regions of the Baltic Sea in the 1st millennium AD. *Archaeol. Balt.* 23, 181–198.

- S15. Yunusbayev, B., Metspalu, M., Järve, M., Kutuev, I., Rootsi, S., Metspalu, E., Behar, D.M., Varendi, K., Sahakyan, H., Khusainova, R., *et al.* (2012). The Caucasus as an asymmetric semipermeable barrier to ancient human migrations. *Mol. Biol. Evol.* *29*, 359–365.
- S16. Lazaridis, I., Nadel, D., Rollefson, G., Merrett, D.C., Rohland, N., Mallick, S., Fernandes, D., Novak, M., Gamarra, B., Sirak, K., *et al.* (2016). Genomic insights into the origin of farming in the ancient Near East. *Nature* *536*, 419–424.
- S17. Narasimhan, V.M., Patterson, N.J., Moorjani, P., Lazaridis, I., Mark, L., Mallick, S., Rohland, N., Bernardos, R., Kim, A.M., Nakatsuka, N., *et al.* (2018). The genomic formation of South and Central Asia. *bioRxiv*, 292581.
- S18. Li, J.Z., Absher, D.M., Tang, H., Southwick, A.M., Casto, A.M., Ramachandran, S., Cann, H.M., Barsh, G.S., Feldman, M., Cavalli-Sforza, L.L., *et al.* (2008). Worldwide human relationships inferred from genome-wide patterns of variation. *Science* *319*, 1100–1104.
- S19. Rasmussen, M., Li, Y., Lindgreen, S., Pedersen, J.S., Albrechtsen, A., Moltke, I., Metspalu, M., Metspalu, E., Kivisild, T., Gupta, R., *et al.* (2010). Ancient human genome sequence of an extinct Palaeo-Eskimo. *Nature* *463*, 757–762.
- S20. Raghavan, M., Skoglund, P., Graf, K.E., Metspalu, M., Albrechtsen, A., Moltke, I., Rasmussen, S., Stafford, T.W., Orlando, L., Metspalu, E., *et al.* (2014). Upper Palaeolithic Siberian genome reveals dual ancestry of Native Americans. *Nature* *505*, 87–91.
- S21. Damgaard, P. de B., Marchi, N., Rasmussen, S., Peyrot, M., Renaud, G., Korneliussen, T., Moreno-Mayar, J.V., Pedersen, M.W., Goldberg, A., Usmanova, E., *et al.* (2018). 137 ancient human genomes from across the Eurasian steppes. *Nature* *557*, 369–374.
- S22. Yunusbayev, B., Metspalu, M., Metspalu, E., Valeev, A., Litvinov, S., Valiev, R., Akhmetova, V., Balanovska, E., Balanovsky, O., Turdikulova, S., *et al.* (2015). The genetic legacy of the expansion of Turkic-speaking nomads across Eurasia. *PLoS Genet.* *11*, e1005068.
- S23. Behar, D.M., Yunusbayev, B., Metspalu, M., Metspalu, E., Rosset, S., Parik, J., Rootsi, S., Chaubey, G., Kutuev, I., Yudkovsky, G., *et al.* (2010). The genome-wide structure of the Jewish people. *Nature* *466*, 238–242.
- S24. Kushniarevich, A., Utevska, O., Chuhryaeva, M., Agdzhoyan, A., Dibirova, K., Uktveryte, I., Möls, M., Mulahasanovic, L., Pshenichnov, A., Frolova, S., *et al.* (2015). Genetic heritage of the Balto-Slavic speaking populations: a synthesis of autosomal, mitochondrial and Y-chromosomal data. *PloS One* *10*, e0135820.
- S25. Lamnidis, T.C., Majander, K., Jeong, C., Salmela, E., Wessman, A., Moiseyev, V., Khartanovich, V., Balanovsky, O., Ongyerth, M., Weihmann, A., *et al.* (2018). Ancient Fennoscandian genomes reveal origin and spread of Siberian ancestry in Europe. *Nat. Commun.* *9*, 5018.
- S26. de Barros Damgaard, P., Martiniano, R., Kamm, J., Moreno-Mayar, J.V., Kroonen, G., Peyrot, M., Barjamovic, G., Rasmussen, S., Zacho, C., Baimukhanov, N., *et al.* (2018). The first horse herders and the impact of early Bronze Age steppe expansions into Asia. *Science* *360*.
- S27. Fedorova, S.A., Reidla, M., Metspalu, E., Metspalu, M., Rootsi, S., Tambets, K., Trofimova, N., Zhadanov, S.I., Hooshiar Kashani, B., Olivieri, A., *et al.* (2013). Autosomal and uniparental portraits of the native populations of Sakha (Yakutia): implications for the peopling of Northeast Eurasia. *BMC Evol. Biol.* *13*, 127.



- S28. Mittnik, A., Wang, C.-C., Pfrengle, S., Daubaras, M., Zariņa, G., Hallgren, F., Allmäe, R., Khartanovich, V., Moiseyev, V., Tõrv, M., *et al.* (2018). The genetic prehistory of the Baltic Sea region. *Nat. Commun.* 9, 442.
- S29. Tambets, K., Yunusbayev, B., Hudjashov, G., Ilumäe, A.-M., Rootsi, S., Honkola, T., Vesakoski, O., Atkinson, Q., Skoglund, P., Kushniarevich, A., *et al.* (2018). Genes reveal traces of common recent demographic history for most of the Uralic-speaking populations. *Genome Biol.* 19, 139.
- S30. Saag, L., Varul, L., Scheib, C.L., Stenderup, J., Allentoft, M.E., Saag, L., Pagani, L., Reidla, M., Tambets, K., Metspalu, E., *et al.* (2017). Extensive farming in Estonia started through a sex-biased migration from the Steppe. *Curr. Biol. CB* 27, 2185-2193.e6.
- S31. Mathieson, I., Alpaslan-Roodenberg, S., Posth, C., Szécsényi-Nagy, A., Rohland, N., Mallick, S., Olalde, I., Broomandkhoshbacht, N., Candilio, F., Cheronet, O., *et al.* (2018). The genomic history of southeastern Europe. *Nature* 555, 197–203.
- S32. Jones, E.R., Zarina, G., Moiseyev, V., Lightfoot, E., Nigst, P.R., Manica, A., Pinhasi, R., and Bradley, D.G. (2017). The Neolithic transition in the Baltic was not driven by admixture with early European farmers. *Curr. Biol. CB* 27, 576–582.
- S33. Behar, D.M., Metspalu, M., Baran, Y., Kopelman, N.M., Yunusbayev, B., Gladstein, A., Tzur, S., Sahakyan, H., Bahmanimehr, A., Yepiskoposyan, L., *et al.* (2013). No evidence from genome-wide data of a Khazar origin for the Ashkenazi Jews. *Hum. Biol.* 85, 859–900.
- S34. Unterländer, M., Palstra, F., Lazaridis, I., Pilipenko, A., Hofmanová, Z., Groß, M., Sell, C., Blöcher, J., Kirsanow, K., Rohland, N., *et al.* (2017). Ancestry and demography and descendants of Iron Age nomads of the Eurasian Steppe. *Nat. Commun.* 8, 14615.
